# Supplementary material
Source: publisher site journal article supplement (https://static.cambridge.org/content/id/urn:cambridge.org:id:article:S1368980020000543/resource/name/S1368980020000543supp002.docx)
Supplement: Supplementary file 1 [file S1368980020000543supp002.docx]

**Supplemental Material 1** The flowchart to demonstrate the selection process for the data included in the analysis of associations of dietary diversity with anemia and iron status in children

NW2 intervention study

*n* 556

Dietary data collected

*n* 376

Dietary data collected

*n* 100

Dietary data collected

*n* 102

NW1 intervention study

*n* 167

KZN intervention study

*n* 321

Dietary data collected and included in pooled analysis

*n* 578

(*n* 578)

Excluded: no dietary data

*n* 466 (44.6%)
